# Supplementary material for: Advancing liquid contact line on visco-elastic gel substrates: stick-slip vs. continuous motions
Source: Royal Society of Chemistry journal article supplement (doi:10.1039/c2sm26714d), 2012-10-24
Supplement: c2sm26714d.pdf [file c2sm26714d.pdf]

Movie caption:

Stick-slip motions of a water droplet on SBS-Paraffin gel. The polymer concentration of the gel  $c_{\text{SBS}}$  is 10%, and the inflation rate  $q$  is  $20 \mu \text{ l/min}$ . The actual duration of the film is 1300 sec. The white line on the upper right indicates a scale bar of 3 mm.
